# Supplementary material for: Effect of Gate Bias Stress on the Electrical Characteristics of Ferroelectric Oxide Thin-Film Transistors with Poly(Vinylidenefluoride-Trifluoroethylene)
Source: MDPI journal article supplement (doi:10.3390/ma16062285), 2023-03-12
Supplement: s1 [file s1]

# Supplementary Materials

## Effect of Gate Bias Stress on the Electrical Characteristics of Ferroelectric Oxide Thin-Film Transistors with Poly(Vinylidene fluoride-Trifluoroethylene)

Bon-Seong Gu<sup>1</sup>, Eun-Seo Park<sup>1</sup>, Jin-Hyuk Kwon<sup>2,\*</sup> and Min-Hoi Kim<sup>1,2,\*</sup>

<sup>1</sup>Department of Creative Convergence Engineering, Hanbat National University, Daejeon 34158, Republic of Korea

<sup>2</sup> Research Institute of Printed Electronics & 3D Printing, Industry University Cooperation Foundation, Hanbat National University, Daejeon 34158, Republic of Korea

\* Correspondence: jhkwon@hanbat.ac.kr (J.-H.K.); mhkim8@hanbat.ac.kr (M.-H.K.); Tel.: +82-42-821-1973 (M.-H.K.)

Figure S1d shows the circuit diagram for the GBS (i.e., NBS and PBS) before measuring each transfer characteristic curve. Figure S1e–g show the transfer characteristic the conventional bottom-gate OxTFT with the dielectric gate insulator (i.e., silicon dioxide), top-gate OxTFT with the dielectric gate insulator (i.e., PMMA), and top-gate OxTFT with the ferroelectric gate insulator (i.e., P(VDF-TrFE)) after 1-h NBS and 1-h PBS, respectively in linear scale. The linear mobility ( $\mu_{lin}$ ) was extracted from the slope of the drain current ( $I_D$ ) vs. gate voltage ( $V_G$ ) plots, based on the following equation:  $\mu_{lin} = \frac{dI_D}{dV_G} \left( \frac{LC_i}{wV_D} \right)$  where  $C_i$  is the gate-insulator capacitance and  $V_D$  the drain voltage. For the conventional bottom-gate OxTFT with the dielectric gate insulator (i.e., silicon dioxide), the  $\mu_{lin}$  values were 31.5 cm<sup>2</sup>/Vs (initial), 32.8 cm<sup>2</sup>/Vs (after NBS), and 20.2 cm<sup>2</sup>/Vs (after PBS), respectively. For the top-gate OxTFT with the dielectric gate insulator (i.e., PMMA), the  $\mu_{lin}$  values were 0.8 cm<sup>2</sup>/Vs (initial), 1.5 cm<sup>2</sup>/Vs (after NBS), and 0.1 cm<sup>2</sup>/Vs (after PBS), respectively. For the top-gate OxTFT with the ferroelectric gate insulator (i.e., P(VDF-TrFE)), the  $\mu_{lin}$  values are presented in Figure S1g. These  $\mu_{lin}$  values are considered unreasonable, since they were possibly over- or under-estimated due to dipole changes in the P(VDF-TrFE) layer during the  $V_G$  sweep.

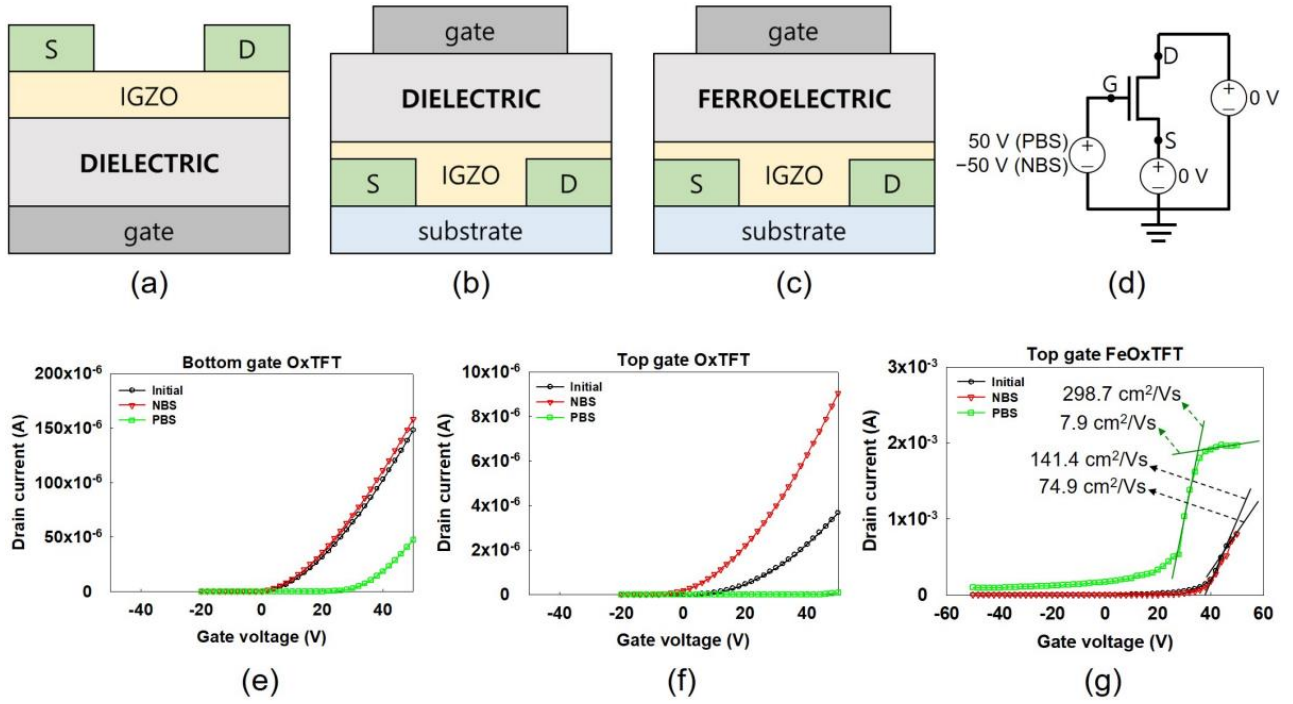

**Figure S1.** The device structures for (a) the conventional bottom-gate OxTFT with a dielectric gate insulator, (b) top-gate OxTFT with a dielectric gate insulator, and (c) top-gate OxTFT with a ferroelectric gate insulator. (d) The circuit diagram for the GBS. The transfer characteristic curves of (e) the conventional bottom-gate OxTFT with the dielectric gate insulator (i.e., silicon dioxide), (f) top-gate OxTFT with the dielectric gate insulator (i.e., PMMA), and (g) top-gate OxTFT with the ferroelectric gate insulator (i.e., P(VDF-TrFE)) after 1-h NBS and 1-h PBS.

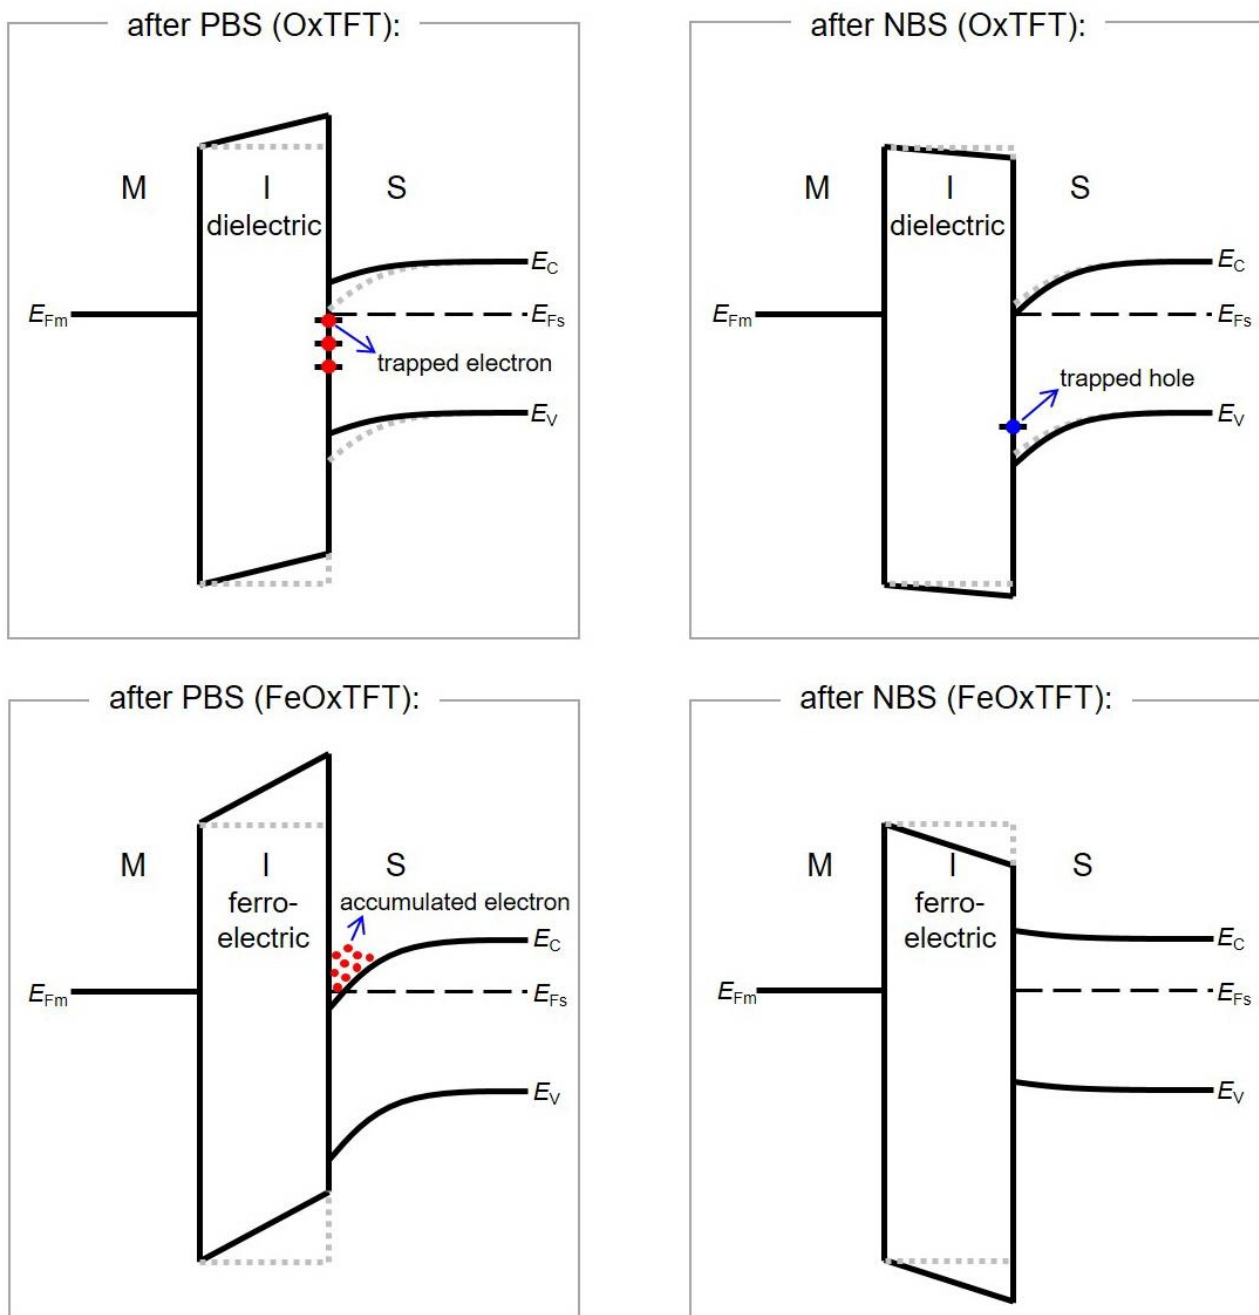

**Figure S2.** The energy band diagrams for the OxTFT and FeOxTFT subjected to the PBS and NBS.

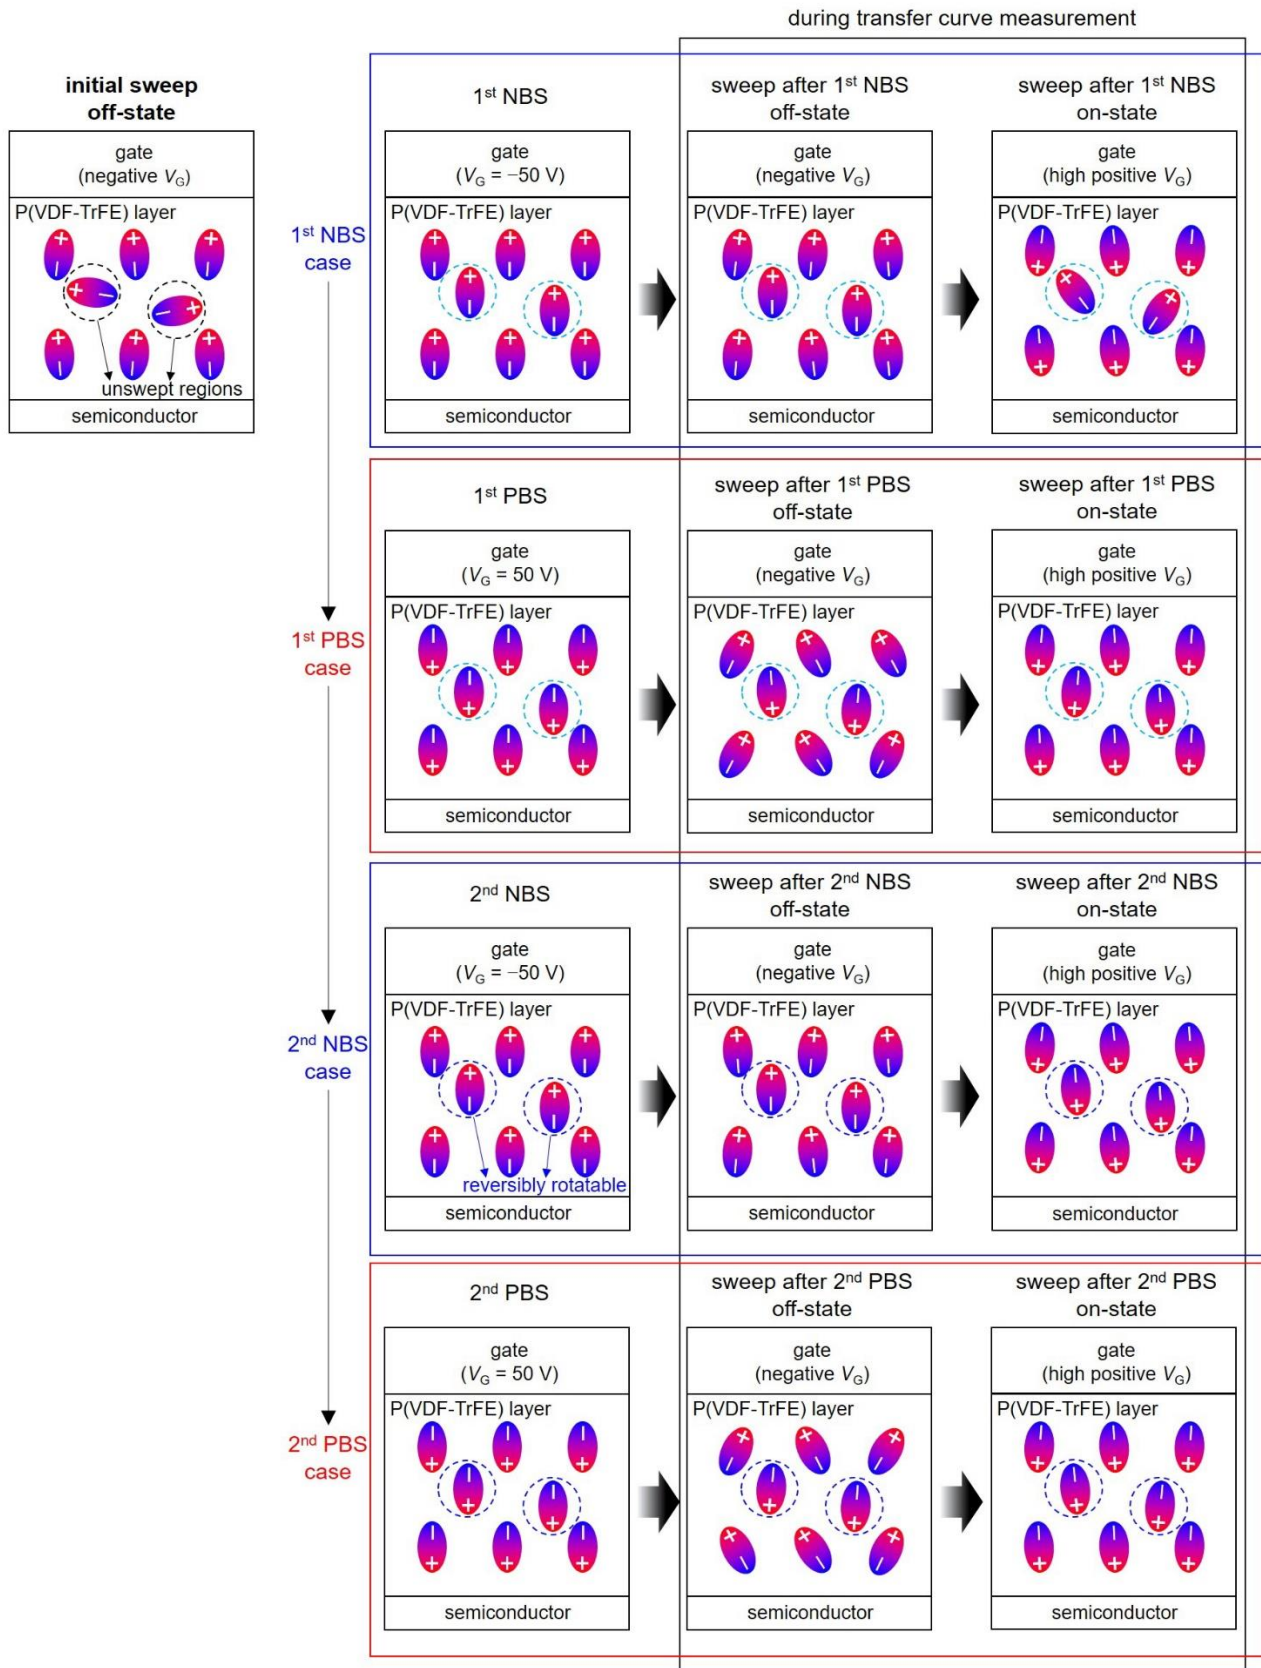

**Figure S3.** Schematic diagrams for the ferroelectric dipole changes in the P(VDF-TrFE) layer in the PBS and

NBS cases.
